# Supplementary material for: Folate-Appended Hydroxypropyl-β-Cyclodextrin Induces Autophagic Cell Death in Acute Myeloid Leukemia Cells
Source: MDPI journal article supplement (doi:10.3390/ijms242316720), 2023-11-24
Supplement: s1 [file Table S1.pdf › Table S1.pdf]

**Table S1.** IC<sub>50</sub> values of FA-HP-β-CyD and HP-β-CyD in various AML cell lines (with SEM)

| Cell Line | IC <sub>50</sub> (mM) |             |
|-----------|-----------------------|-------------|
|           | HP-β-CyD              | FA-HP-β-CyD |
| HL-60     | 7.66 ± 1.59           | 0.62 ± 0.07 |
| THP-1     | 9.05 ± 0.27           | 0.32 ± 0.07 |
| SKM-1     | 9.44 ± 0.66           | 0.20 ± 0.05 |
| Kasumi-1  | 3.14 ± 0.42           | 0.30 ± 0.02 |

Values represent the mean ± SEM of at least three independent experiments.
